# Supplementary material for: A facile precipitation synthesis of mesoporous 2-line ferrihydrite with good fluoride removal properties
Source: Royal Society of Chemistry journal article supplement (doi:10.1039/c5ra15619j), 2015-01-01
Supplement: c5ra15619j1.pdf [file c5ra15619j1.pdf]

Supporting information for

**A facile precipitation synthesis of mesoporous 2-line  
ferrihydrite with good fluoride removal properties**

Bai-Sheng Zhu<sup>a, b</sup>, Yong Jia<sup>b, c\*</sup>, Zhen Jin<sup>b</sup>, Bai Sun<sup>b</sup>, Tao Luo<sup>b</sup>, Ling-Tao Kong<sup>a, b, \*</sup>,

Jin-Huai Liu<sup>a, b</sup>

<sup>a</sup>Department of Materials Science and Engineering, University of Science and  
Technology of China, Hefei 230026, P. R. China.

<sup>b</sup>Nanomaterials and Environmental Detection Laboratory, Institute of Intelligent  
Machines, Hefei Institutes of Physical Science, Chinese Academy of Sciences, Hefei  
230031, P. R. China.

<sup>c</sup>Department of Pharmacy, Institute of Pharmaceutical Chemistry, Anhui University of  
Chinese Medicine, Hefei 230012, P. R. China.

---

\* Corresponding author at: Fax: 86 551 65592420; Tel: 86 551 65591142; E-mail address:  
yjiaahedu@163.com and ltkong@iim.cas.cn

**Table S1** Comparison of Weber and Morris model, and Bangham's model parameters (temperature = 25 °C, adsorbent dose = 1 g L<sup>-1</sup>, pH = 7.0).

| Weber and Morris model      |                                                     |          |                                                     |        |
|-----------------------------|-----------------------------------------------------|----------|-----------------------------------------------------|--------|
| $C_0$ (mg L <sup>-1</sup> ) | $k_{ip1}$ (mg g <sup>-1</sup> min <sup>-0.5</sup> ) | $R^2$    | $k_{ip2}$ (mg g <sup>-1</sup> min <sup>-0.5</sup> ) | $R^2$  |
| 2.5                         | 0.0041                                              | 0.8978   | 0.0003                                              | 0.9680 |
| 5                           | 0.0263                                              | 0.7174   | 0.0043                                              | 0.9023 |
| 10                          | 0.2234                                              | 0.7692   | 0.0060                                              | 0.8925 |
| Bangham's model             |                                                     |          |                                                     |        |
| $C_0$ (mg L <sup>-1</sup> ) | $K_b$ (mL(g L <sup>-1</sup> ) <sup>-1</sup> )       | $\alpha$ | $R^2$                                               |        |
| 2.5                         | 850.4                                               | 0.0398   | 0.9960                                              |        |
| 5                           | 607.7                                               | 0.0533   | 0.9425                                              |        |
| 10                          | 425.5                                               | 0.1481   | 0.9854                                              |        |

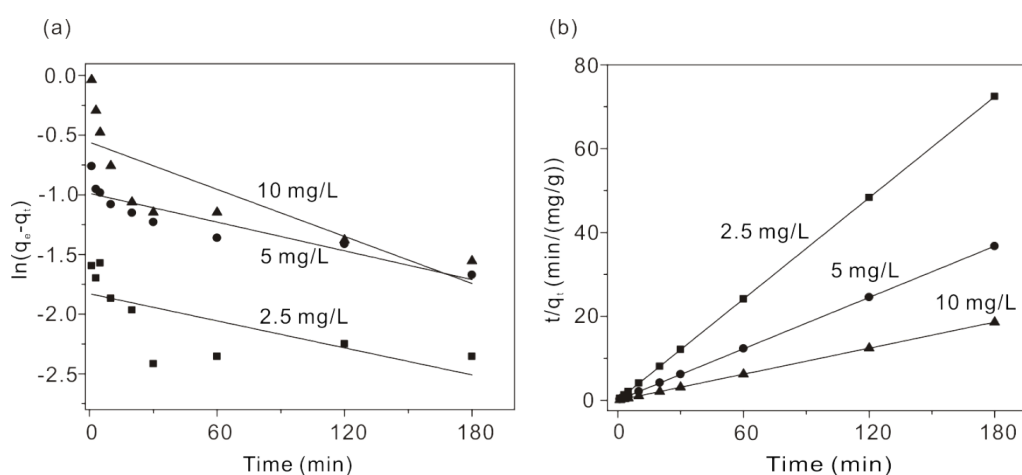

**Fig. S1.** Kinetics modeling of fluoride adsorption pseudo-first-order kinetic plots (a) and pseudo-second-order kinetic plots (b).
